# Supplementary material
Source: PubMed Central journal article supplement (PMC6504580)
Supplement: NIHMS1526015-supplement-2.pdf [file NIHMS1526015-supplement-2.pdf]

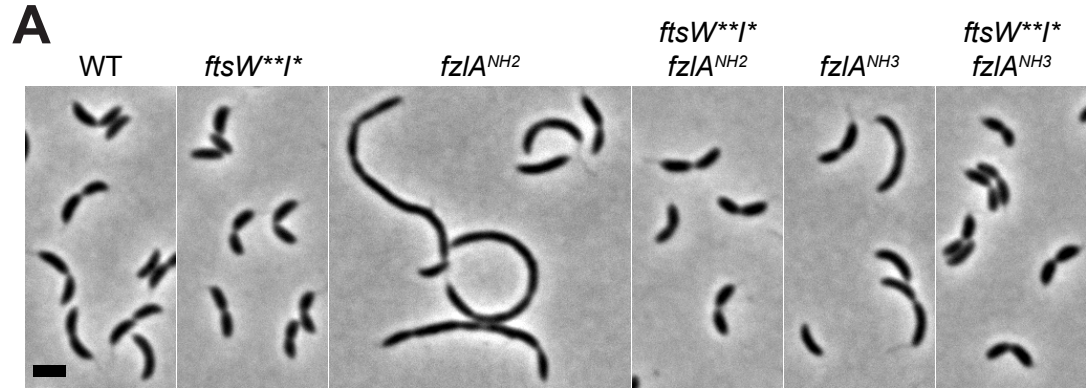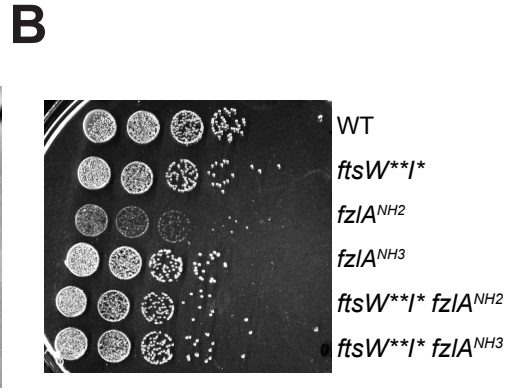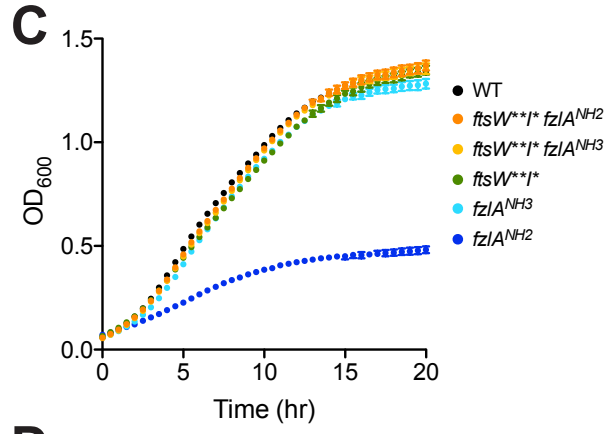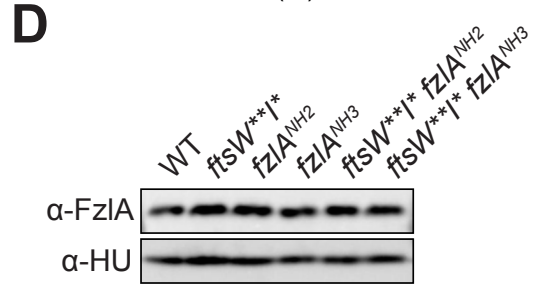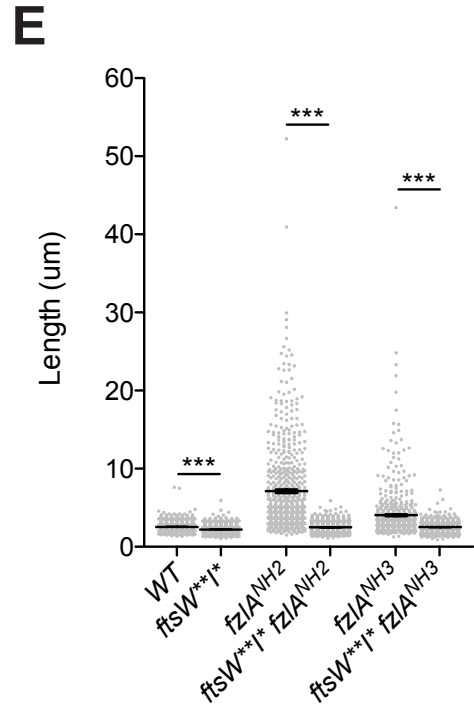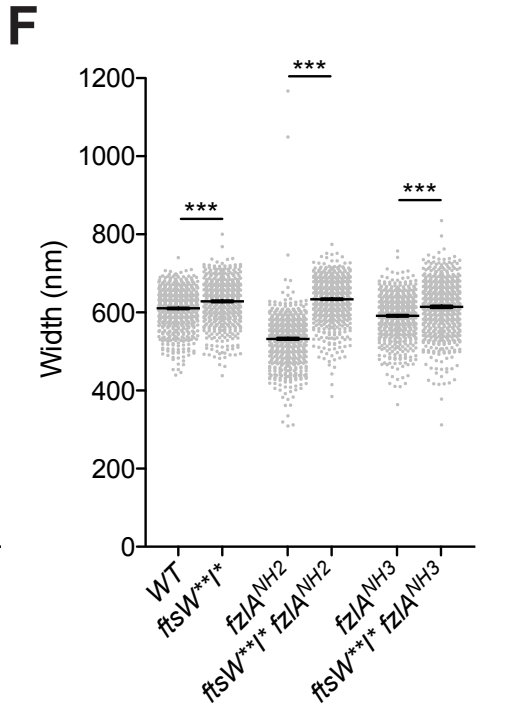

**Figure S1. *ftsW\*\*I\** rescue the fitness/morphological defects of two *fzIA* mutants. Related to Figure 1.**

(A) Phase contrast microscopy images depicting cells of the indicated strains. Scale bar = 2  $\mu\text{m}$ . (B, C) Spot dilutions (diluted ten-fold) (B) and growth curves (C) of the indicated strains. (D)  $\alpha$ -FzIA immunoblot (top) and  $\alpha$ -HU immunoblot (bottom, loading control) of the indicated strains. (E, F) Lengths (E) and widths (F) of unsynchronized cells from the indicated strains. Mean  $\pm$  SEM shown. Kruskal-Wallis tests with Dunn's post-test were performed to analyze differences compared to the indicated strains: \*\*\* $P \leq 0.001$ . From left to right,  $n = 674, 609, 606, 653, 618, 645$ . Strain key (*Caulobacter crescentus*): WT (EG865), *ftsW\*\*I\* fzIA* (EG1557), *fzIA<sup>NH2</sup>* (EG1600), *ftsW\*\*I\* fzIA<sup>NH2</sup>* (EG2111), *fzIA<sup>NH3</sup>* (EG1909), *ftsW\*\*I\* fzIA<sup>NH3</sup>* (EG2489).

**A***ftsW\*\*I\** +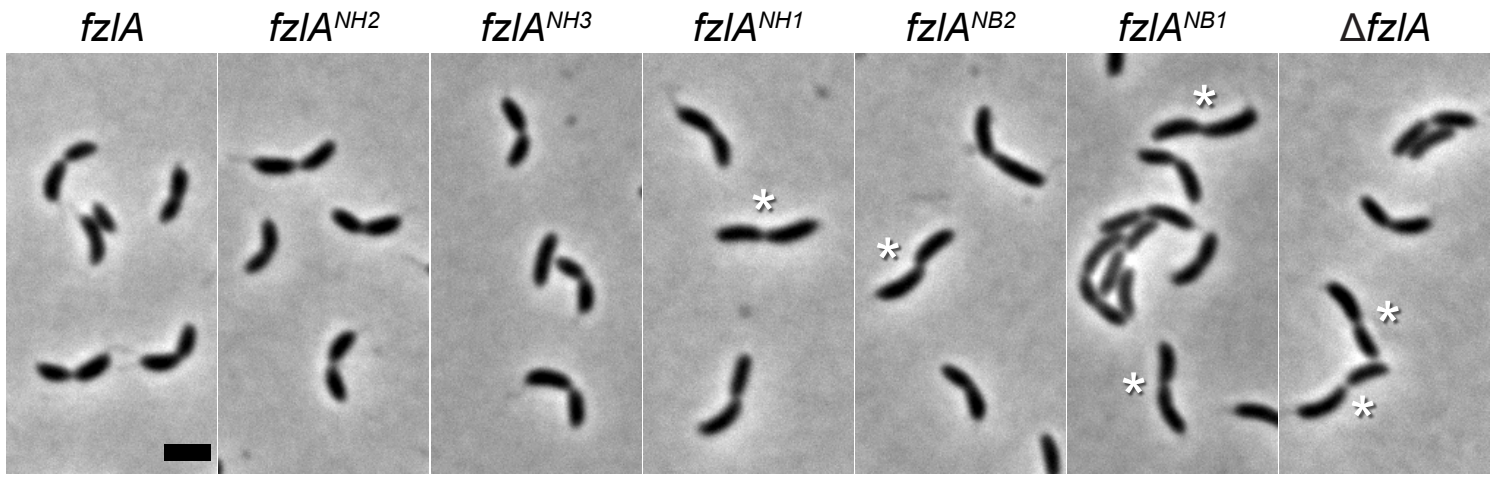**B**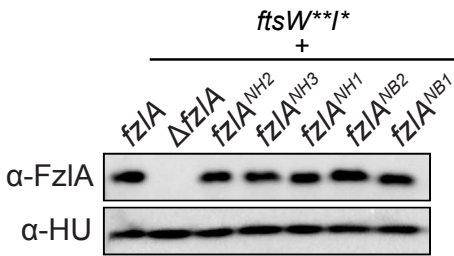**C**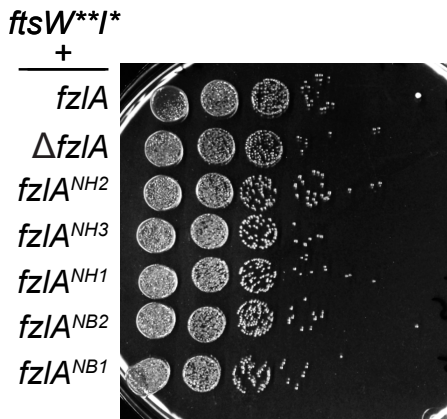**D**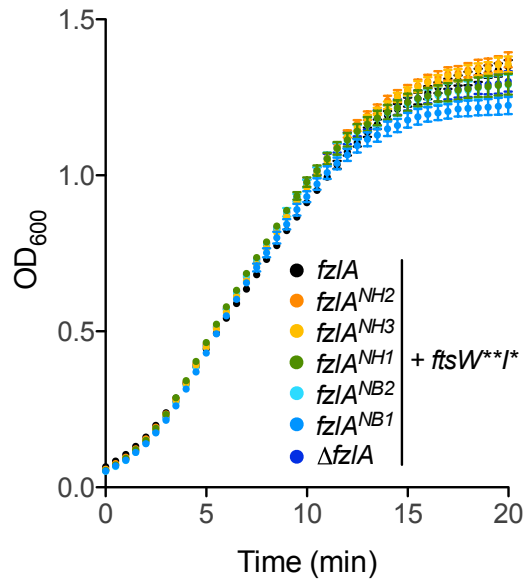**E**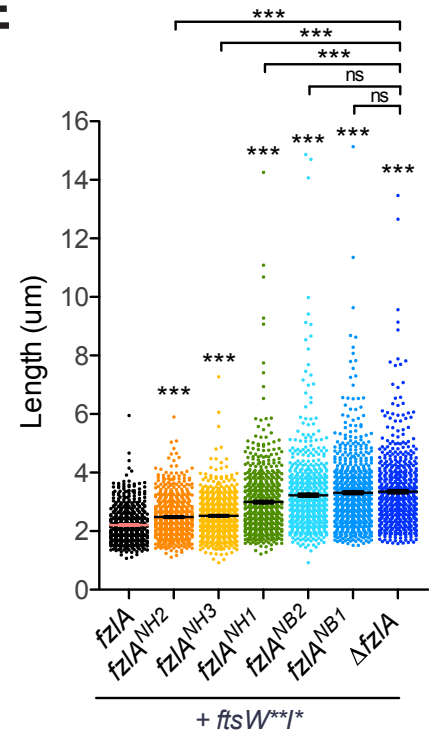

**Figure S2. In the presence of hyperactive PG synthases, the interaction between FtsZ and FzlA determines division efficiency, but not growth rate or viability. Related to Figure 1.**

(A) Phase contrast microscopy images depicting cells of the indicated strains. White asterisks mark S-shaped cells. Scale bar = 2  $\mu\text{m}$ . (B)  $\alpha$ -FzlA immunoblot (top) and  $\alpha$ -HU immunoblot (bottom, loading control) of the indicated strains. (C, D) Spot dilutions (diluted ten-fold) (C) and growth curves (D) of the indicated strains. (E) Lengths of unsynchronized cells from the indicated strains. Mean  $\pm$  SEM shown. Kruskal-Wallis tests with Dunn's post-test were performed to analyze differences compared to WT and the indicated strains:  $^{ns}P > 0.05$ ,  $^{***}P \leq 0.001$ . From left to right,  $n = 609, 653, 645, 688, 674, 729, 612$ . Strain key (*Caulobacter crescentus*): *ftsW\*\*I\* fzlA* (EG1557), *ftsW\*\*I\* fzlA<sup>NH2</sup>* (EG2111), *ftsW\*\*I\* fzlA<sup>NH3</sup>* (EG2489), *ftsW\*\*I\* fzlA<sup>NH1</sup>* (EG2492), *ftsW\*\*I\* fzlA<sup>NB2</sup>* (EG2485), *ftsW\*\*I\* fzlA<sup>NB1</sup>* (EG2495), *ftsW\*\*I\*  $\Delta$ fzlA* (EG2170).

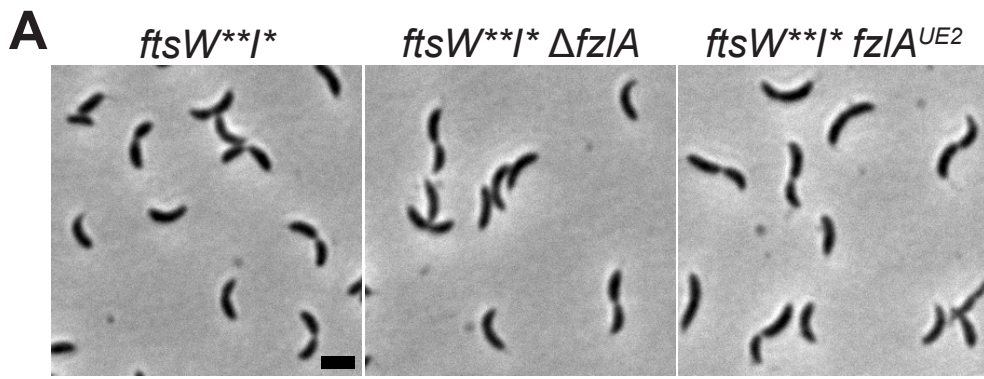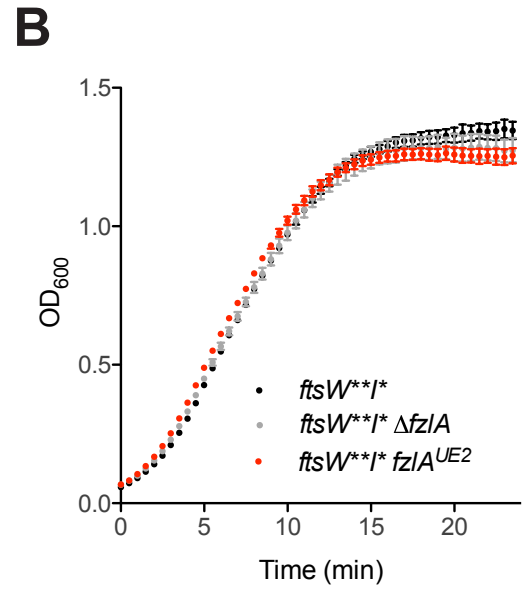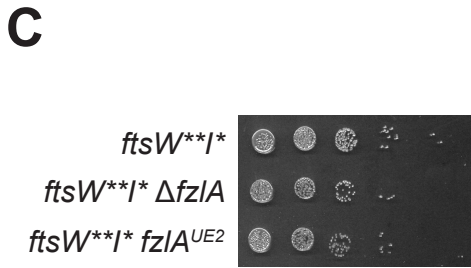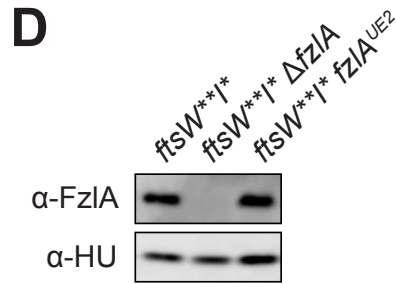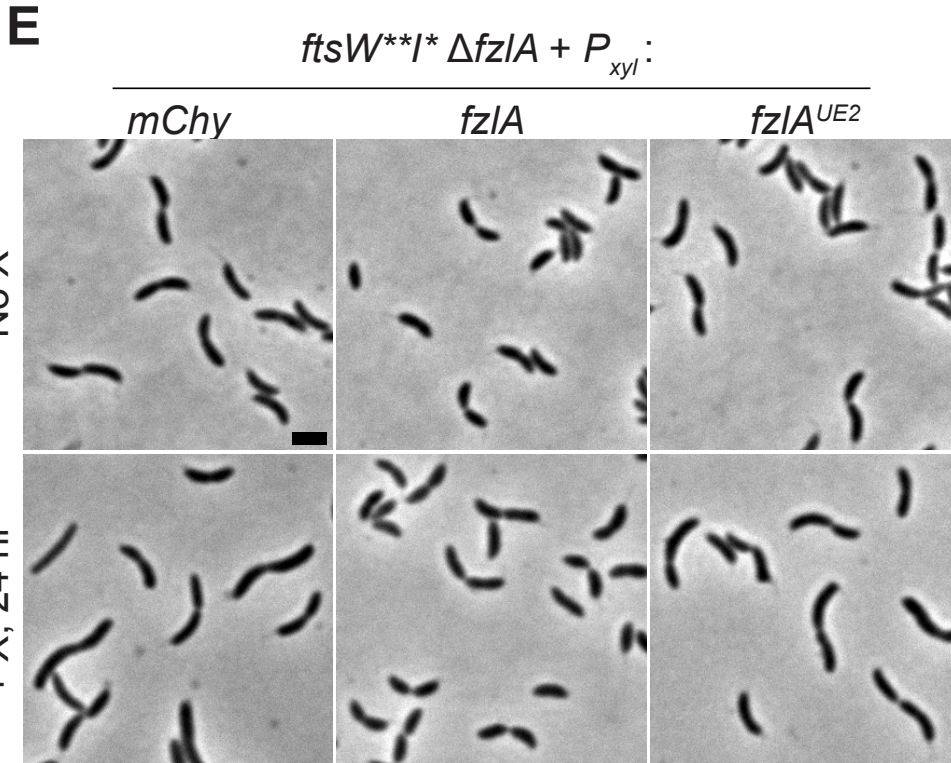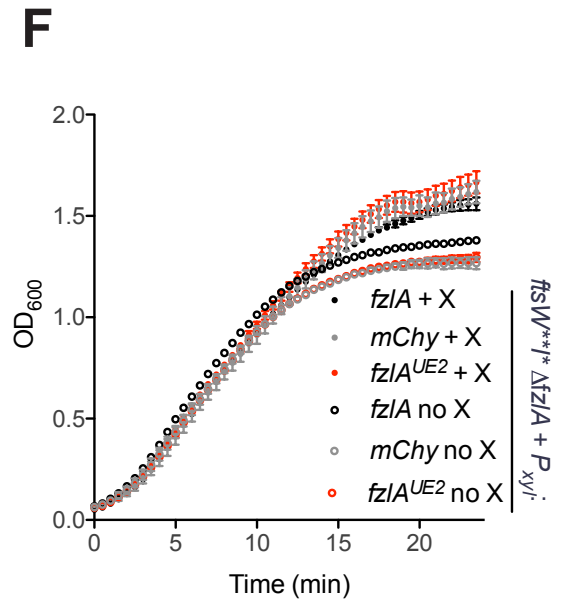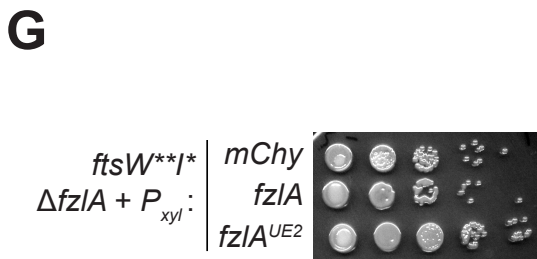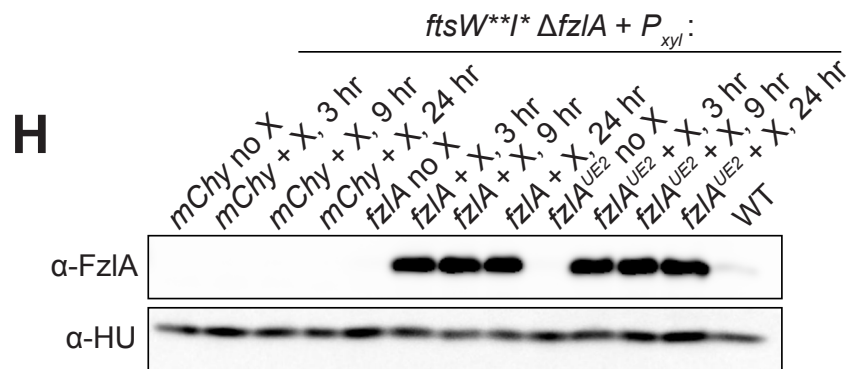

**Figure S3. Mutation of FzLA's essential C-terminus phenocopies loss of *fzLA* in an *ftsW\*\*I\** background. Related to Figure 1.**

(A) Phase contrast microscopy images depicting cells of the indicated strains. Scale bar = 2  $\mu$ m. (B,C) Growth curves (B) and spot dilutions (diluted ten-fold) (C) of the indicated strains. (D)  $\alpha$ -FzLA immunoblot (top) and  $\alpha$ -HU immunoblot (bottom, loading control) of the indicated strains. (E) Phase contrast microscopy images depicting cells of the indicated strains with no xylose (top) or incubated in the presence of 0.24% xylose (bottom) for 24 hours to control expression of the indicated gene. Scale bar = 2  $\mu$ m. (F) Growth curves of the indicated strains with no xylose (no X) or incubated in the presence of 0.24% xylose (+X) to control expression of the indicated gene. (G) Spot dilutions (diluted ten-fold) of the indicated strains. (H)  $\alpha$ -FzLA immunoblot (top) and  $\alpha$ -HU immunoblot (bottom, loading control) of the indicated strains with no xylose (no X) or incubated in the presence of 0.24% xylose (+X) for 3, 9, or 24 hours to control expression of the indicated gene. Strain key (*Caulobacter crescentus*): *ftsW\*\*I\** (EG1557), *ftsW\*\*I\**  $\Delta$ *fzLA* (EG2170), *ftsW\*\*I\** *fzLA*<sup>UE2</sup> (EG2895), *ftsW\*\*I\**  $\Delta$ *fzLA* + *P*<sub>xyI</sub> *mChy* (EG2879), *ftsW\*\*I\**  $\Delta$ *fzLA* + *P*<sub>xyI</sub> *fzLA* (EG2866), *ftsW\*\*I\**  $\Delta$ *fzLA* + *P*<sub>xyI</sub> *fzLA*<sup>UE2</sup> (EG2874).

**A**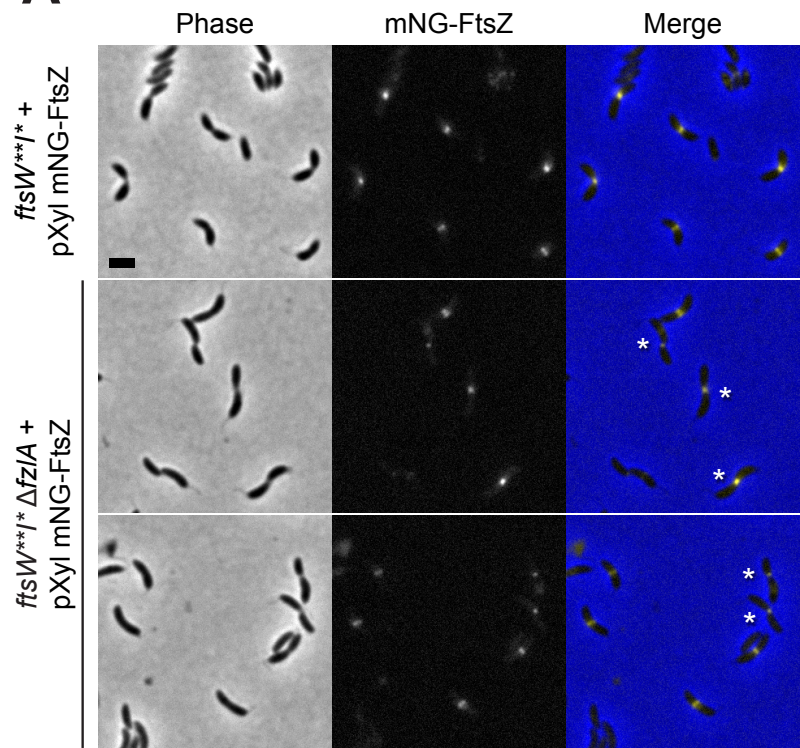**B**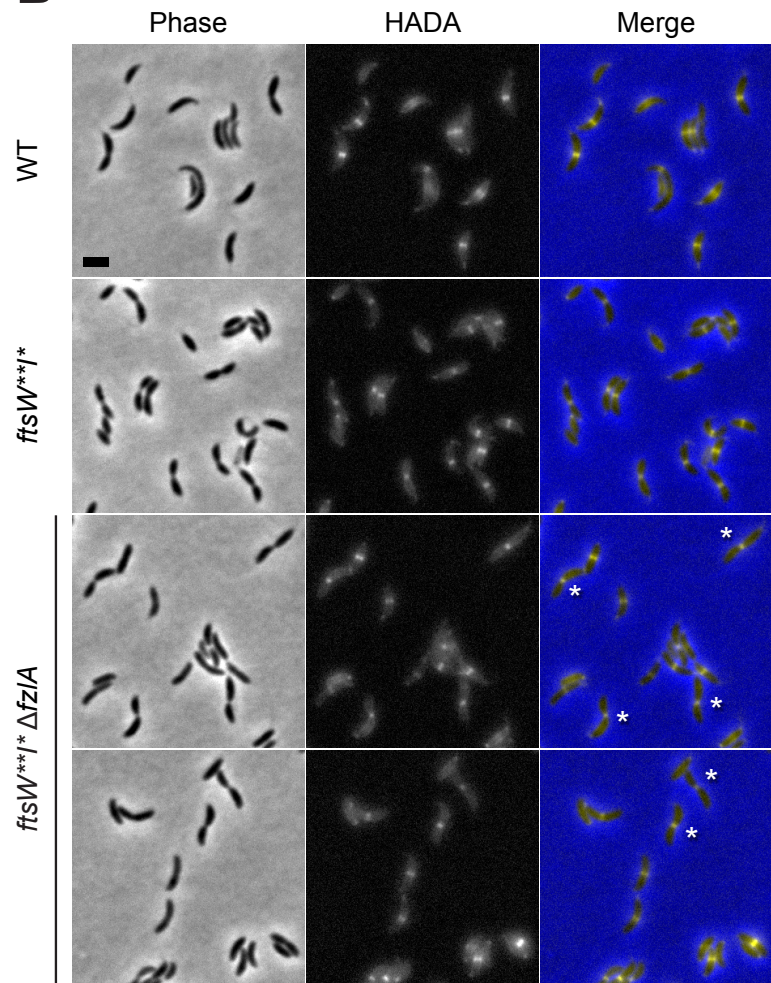**C**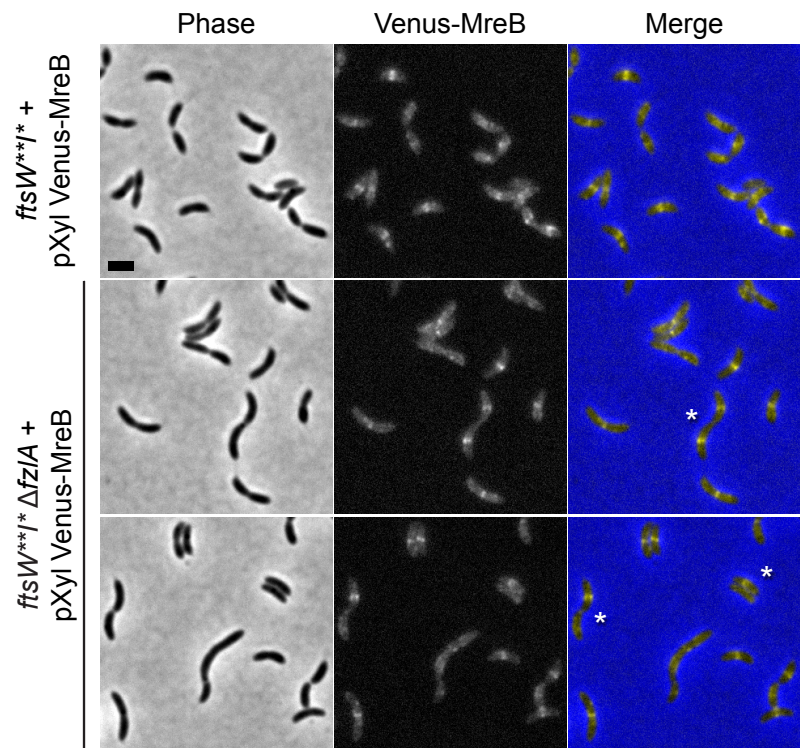

**Figure S4. FtsZ, MreB, and PG synthesis localization is unaffected in *ftsW\*\*I\**  $\Delta$ *fla* cells. Related to Figure 3.**

**(A)** Phase contrast, fluorescence, and merged microscopy images depicting mNG-FtsZ localization in cells of the indicated strains in the presence of inducer (xylose). White asterisks mark S-shaped cells. Scale bar = 2  $\mu$ m. **(B)** Phase contrast, fluorescence, and merged microscopy images depicting Venus-MreB localization in cells of the indicated strains in the presence of inducer (xylose). White asterisks mark S-shaped cells. Scale bar = 2  $\mu$ m. **(C)** Phase contrast, fluorescence, and merged microscopy images depicting HADA localization in cells of the indicated strains after a 5 minute HADA pulse. White asterisks mark S-shaped cells. Scale bar = 2  $\mu$ m. Strain key (*Caulobacter crescentus*): *ftsW\*\*I\** + *pXyl mNG-ftsZ* (EG2157), *ftsW\*\*I\**  $\Delta$ *fla* + *pXyl mNG-ftsZ* (EG2326), *ftsW\*\*I\** + *pXyl Venus-mreB* (EG2377), *ftsW\*\*I\**  $\Delta$ *fla* + *pXyl Venus-mreB* (EG2378), WT (EG865), *ftsW\*\*I\** (EG1557), *ftsW\*\*I\**  $\Delta$ *fla* (EG2170).



**A**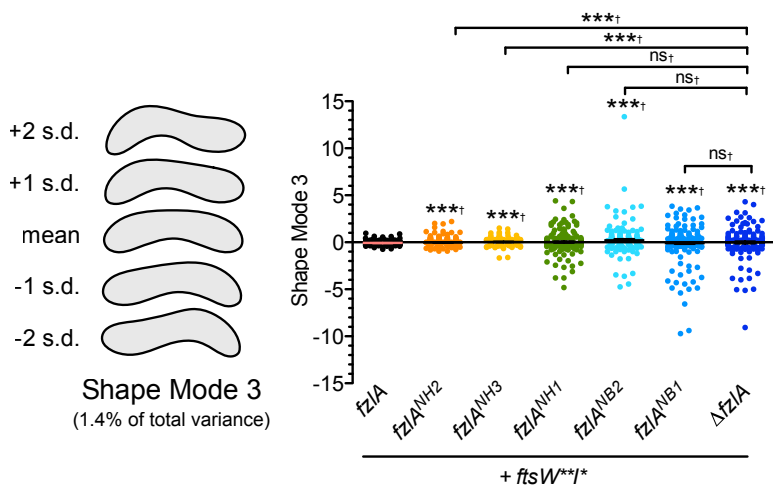**B**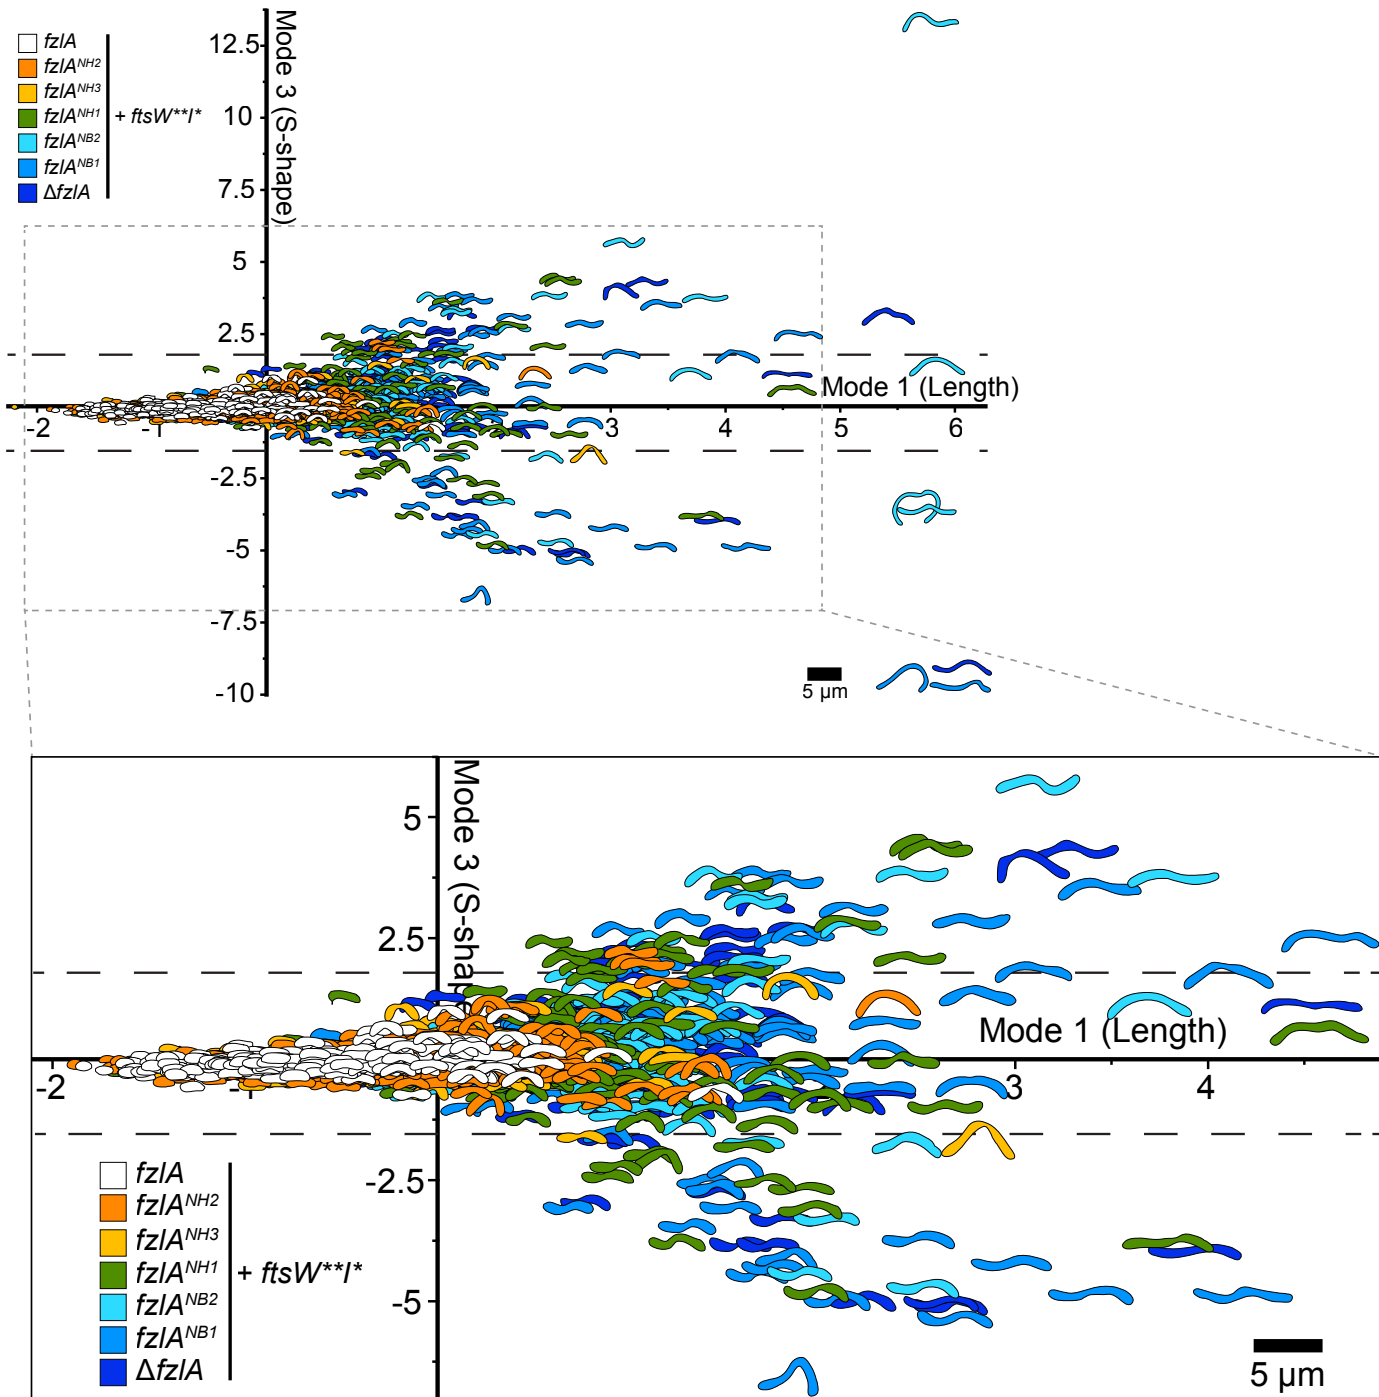

**Figure S5. Interaction of FtsZ with FzlA is necessary for proper division site shape maintenance. Related to Figure 3.**

**(A)** PCA of cell shape in a population of unsynchronized cells (not all cells are necessarily actively constricting) from the indicated strains. Shape mode 3 approximately captures degree of S-shape in cells. Mean cell contour  $\pm 1$  or 2 standard deviations (s.d.) is shown (left). Shape mode values for cells in each strain are plotted and mean  $\pm$  SEM is shown (right). A Brown-Forsythe Levene-type test (which is used in populations not assumed to be normally distributed) was performed to determine differences between population variances ( $\dagger$ ):  $^{ns}P > 0.05$ ,  $^{***}P \leq 0.001$ . From left to right,  $n = 269, 375, 218, 250, 177, 289, 211$ . **(B)** Plot of shape mode 3 (degree of S-shape) vs. shape mode 1 (length) values in a population of unsynchronized cells (not all cells are necessarily actively constricting) from the indicated strains. The dashed lines qualitatively demark the boundary between cells that appear to be S-shaped and those that display normal curvature. Inset presents a zoomed in view of the highlighted region of interest. Strain key (*Caulobacter crescentus*): *ftsW\*\*I\* fzlA* (EG1557), *ftsW\*\*I\* fzlA<sup>NH2</sup>* (EG2111), *ftsW\*\*I\* fzlA<sup>NH3</sup>* (EG2489), *ftsW\*\*I\* fzlA<sup>NH1</sup>* (EG2492), *ftsW\*\*I\* fzlA<sup>NB2</sup>* (EG2485), *ftsW\*\*I\* fzlA<sup>NB1</sup>* (EG2495), *ftsW\*\*I\*  $\Delta$ fzlA* (EG2170).

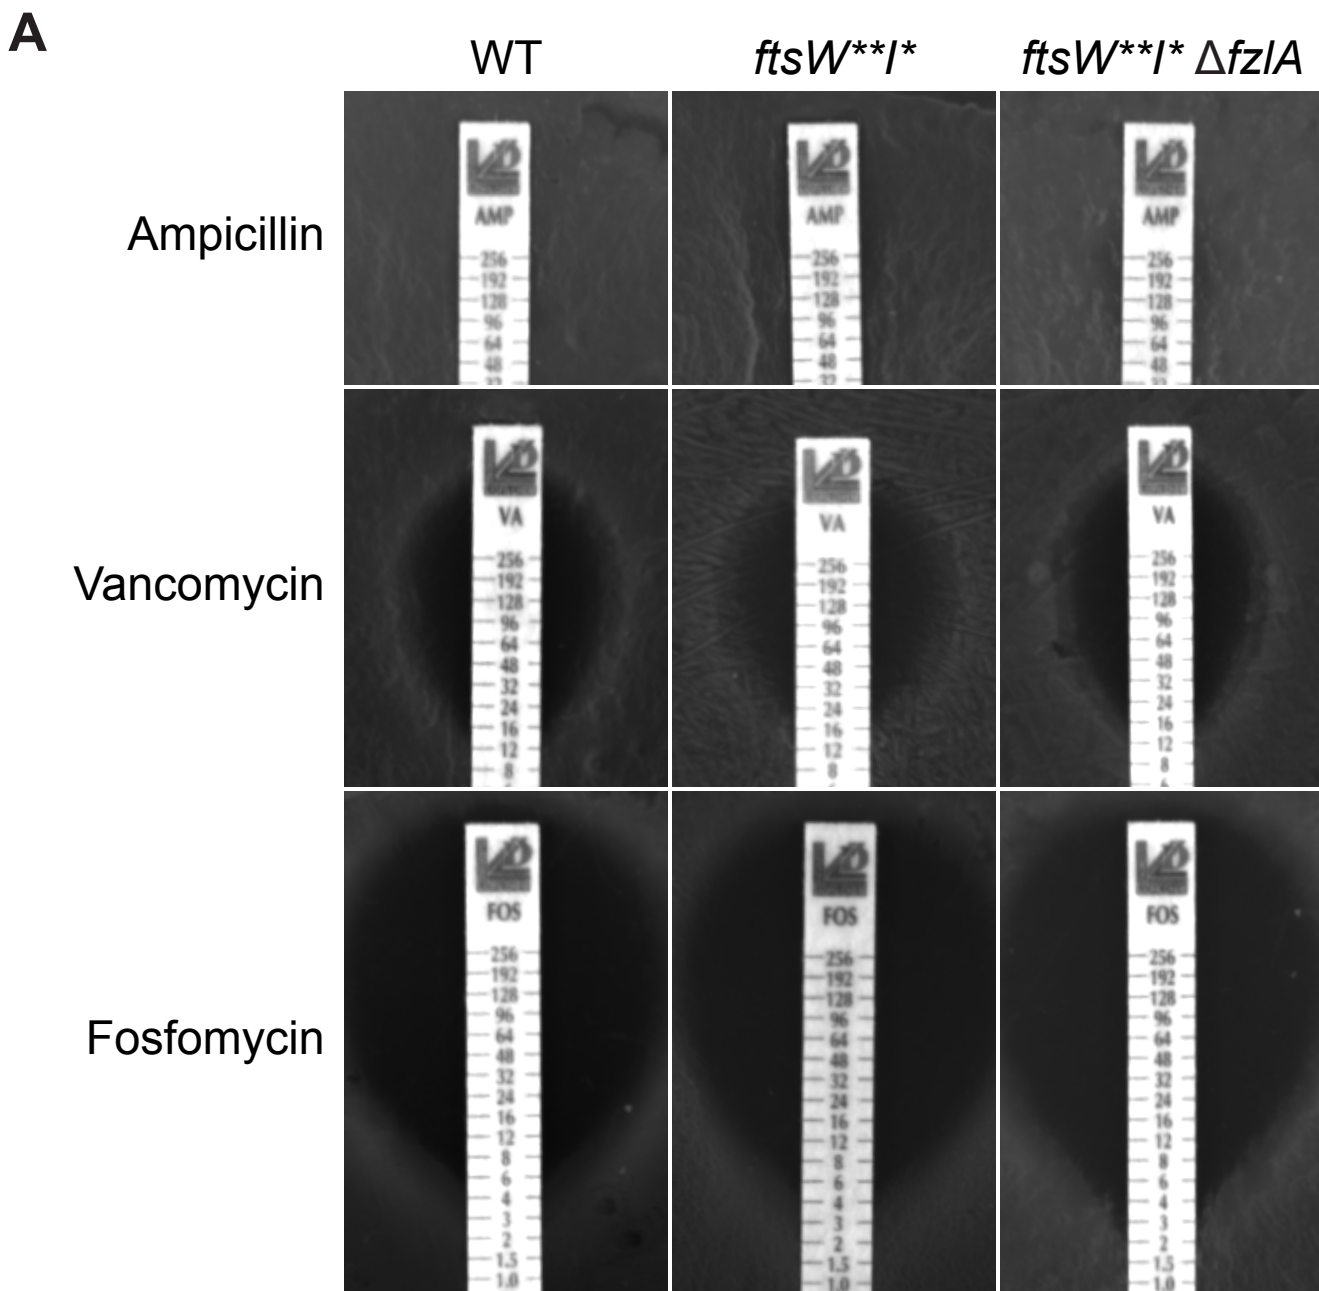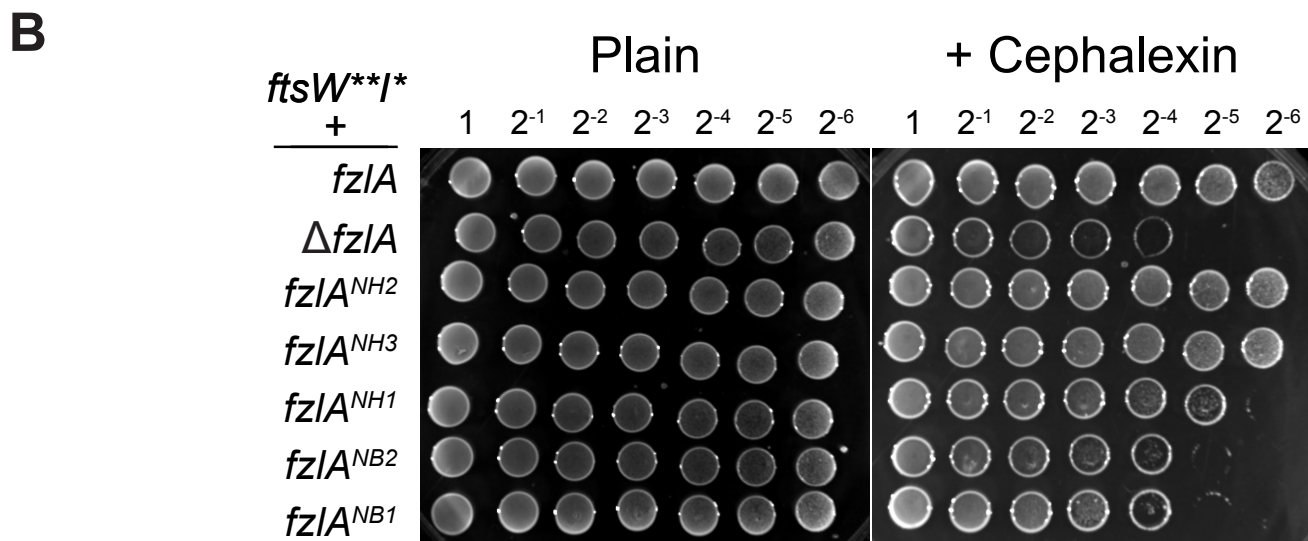

**Figure S6. Effect of loss of FzIA and FzIA-FtsZ interaction on resistance to cell wall antibiotics. Related to Figure 4.**

(A) Plates of the indicated strains grown in the presence of antibiotic minimum inhibitory concentration (MIC) test strips, with antibiotic concentration decreasing from top to bottom. (B) Spot dilutions (diluted two-fold) of the indicated strains plated on PYE ± cephalixin (6 µg/ml). Strain key (*Caulobacter crescentus*): WT (EG865), *ftsW\*\*I\* fzIA* (EG1557), *ftsW\*\*I\* fzIA<sup>NH2</sup>* (EG2111), *ftsW\*\*I\* fzIA<sup>NH3</sup>* (EG2489), *ftsW\*\*I\* fzIA<sup>NH1</sup>* (EG2492), *ftsW\*\*I\* fzIA<sup>NB2</sup>* (EG2485), *ftsW\*\*I\* fzIA<sup>NB1</sup>* (EG2495), *ftsW\*\*I\* ΔfzIA* (EG2170), *fzIA<sup>NH2</sup>* (EG1600), *fzIA<sup>NH3</sup>* (EG1909).

## Supplemental References

- S1. Thanbichler, M., Iniesta, A.A., and Shapiro, L. (2007). A comprehensive set of plasmids for vanillate- and xylose-inducible gene expression in *Caulobacter crescentus*. *Nucleic Acids Res.* *35*, e137.
- S2. Goley, E.D., Comolli, L.R., Fero, K.E., Downing, K.H., and Shapiro, L. (2010). DipM links peptidoglycan remodelling to outer membrane organization in *Caulobacter*. *Mol. Microbiol.* *77*, 56–73.
- S3. Goley, E.D., Dye, N.A., Werner, J.N., Gitai, Z., and Shapiro, L. (2010). Imaging-based identification of a critical regulator of FtsZ protofilament curvature in *Caulobacter*. *Mol. Cell* *39*, 975–987.
- S4. Lariviere, P.J., Szwedziak, P., Mahone, C.R., Löwe, J., and Goley, E.D. (2018). FzIA, an essential regulator of FtsZ filament curvature, controls constriction rate during *Caulobacter* division. *Mol. Microbiol.* *107*, 180–197.
- S5. Goley, E.D., Yeh, Y.-C., Hong, S.-H., Fero, M.J., Abeliuk, E., McAdams, H.H., and Shapiro, L. (2011). Assembly of the *Caulobacter* cell division machine. *Mol. Microbiol.* *80*, 1680–1698.
- S6. Meier, E.L., Daitch, A.K., Yao, Q., Bhargava, A., Jensen, G.J., and Goley, E.D. (2017). FtsEX-mediated regulation of the final stages of cell division reveals morphogenetic plasticity in *Caulobacter crescentus*. *PLOS Genet.* *13*, e1006999.
- S7. Thanbichler, M., and Shapiro, L. (2006). MipZ, a Spatial Regulator Coordinating Chromosome Segregation with Cell Division in *Caulobacter*. *Cell* *126*, 147–162.
- S8. Figueroa-Cuilan, W., Daniel, J.J., Howell, M., Sulaiman, A., and Brown, P.J.B. (2016). Mini-Tn7 Insertion in an Artificial attTn7 Site Enables Depletion of the Essential Master Regulator CtrA in the Phytopathogen *Agrobacterium tumefaciens*. *Appl. Environ. Microbiol.* *82*, 5015–5025.
- S9. Choi, K.-H., Mima, T., Casart, Y., Rholl, D., Kumar, A., Beacham, I.R., and Schweizer, H.P. (2008). Genetic tools for select-agent-compliant manipulation of *Burkholderia pseudomallei*. *Appl. Environ. Microbiol.* *74*, 1064–1075.
- S10. Howell, M., Aliashkevich, A., Sundararajan, K., Daniel, J.J., Lariviere, P.J., Goley, E.D., Cava, F., and Brown, P.J.B. (2019). *Agrobacterium tumefaciens* divisome proteins regulate the transition from polar growth to cell division. *Mol. Microbiol.* Available at: <https://onlinelibrary.wiley.com/doi/abs/10.1111/mmi.14212> [Accessed January 31, 2019].
- S11. Watson, B., Currier, T.C., Gordon, M.P., Chilton, M.D., and Nester, E.W. (1975). Plasmid required for virulence of *Agrobacterium tumefaciens*. *J. Bacteriol.* *123*, 255–264.
- S12. Evinger, M., and Agabian, N. (1977). Envelope-associated nucleoid from *Caulobacter crescentus* stalked and swarmer cells. *J. Bacteriol.* *132*, 294–301.
- S13. Modell, J.W., Kambara, T.K., Perchuk, B.S., and Laub, M.T. (2014). A DNA Damage-Induced, SOS-Independent Checkpoint Regulates Cell Division in *Caulobacter crescentus*. *PLOS Biol* *12*, e1001977.
